# Supplementary material
Source: PubMed Central journal article supplement (PMC2259045)
Supplement: plntphys_pp.107.108647_1.pdf [file plntphys_pp.107.108647_1.pdf]

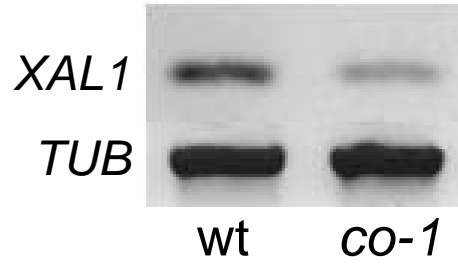

Fig S2. *XAL1* expression in *constans-1* background. Semi quantitative RT-PCR was performed using RNA from 14 days old shoots of wild-type (*wt*) and *constans-1* mutant (*co-1*). *Tubulin* (*TUB*) was amplified as an internal loading control.
