# Supplementary material
Source: PubMed Central journal article supplement (PMC2259045)
Supplement: plntphys_pp.107.108647_2.pdf [file plntphys_pp.107.108647_2.pdf]

Table S1: Quantitative analysis of root development in *xal1-2* and *xal1-3* strong alleles, and their respective wild-type plants.

| Plant line                    | Rate of root growth ( $\mu\text{m h}^{-1}$ ) | Meristem length ( $\mu\text{m}$ ) | Elongation zone ( $\mu\text{m}$ ) | Length of fully elongated cells ( $\mu\text{m}$ ) | Cell cycle duration (h) | Cell production rate ( $\text{cell h}^{-1}$ ) |
|-------------------------------|----------------------------------------------|-----------------------------------|-----------------------------------|---------------------------------------------------|-------------------------|-----------------------------------------------|
| Col-0<br><i>n</i> =17         | 394 $\pm$ 11                                 | 249 $\pm$ 10                      | 1086 $\pm$ 58                     | 164 $\pm$ 6                                       | 10.0 $\pm$ 0.3          | 2.4 $\pm$ 0.3                                 |
| <i>xal1-2</i><br><i>n</i> =20 | 134 $\pm$ 7                                  | 139 $\pm$ 5                       | 548 $\pm$ 25                      | 120 $\pm$ 3                                       | 12.6 $\pm$ 0.9          | 1.1 $\pm$ 0.1                                 |
| Statistics, <i>P</i>          | <0.001                                       | <0.001                            | <0.001                            | <0.001                                            | 0.029                   | <0.001                                        |
|                               |                                              |                                   |                                   |                                                   |                         |                                               |
| Ler<br><i>n</i> =20           | 313 $\pm$ 7                                  | 254 $\pm$ 6                       | 1231 $\pm$ 29                     | 169 $\pm$ 3                                       | 14.2 $\pm$ 0.5          | 1.9 $\pm$ 0.04                                |
| <i>xal1-3</i><br><i>n</i> =20 | 187 $\pm$ 6                                  | 198 $\pm$ 7                       | 1312 $\pm$ 33                     | 160 $\pm$ 3                                       | 16.9 $\pm$ 0.8          | 1.2 $\pm$ 0.04                                |
| Statistics, <i>P</i>          | <0.001                                       | <0.001                            | 0.072                             | 0.064                                             | 0.009                   | <0.001                                        |

Mean $\pm$ SE. As the number of replicates was unequal for Col-0 and *xal1-2*, the *P* was calculated using Mann-Whitney Rank Sum Test; statistical analysis of Ler and *xal1-3* was done using Student's independent *t* test; *n* indicates the number of plants analyzed of two independent experiments. Length of fully elongated cells was calculated as average of averages per each root; in each root 10 cortical cells were measured in young differentiated zone.
