# Supplementary material
Source: PubMed Central journal article supplement (PMC2259045)
Supplement: plntphys_pp.107.108647_3.pdf [file plntphys_pp.107.108647_3.pdf]

TABLE S2: Primers sequences and amplification conditions used for RT-PCR experiments.

| <b>Gene</b>        | <b>Product size<br/>and<br/>Cycles number</b> | <b>Primer sequence</b>                                                      |
|--------------------|-----------------------------------------------|-----------------------------------------------------------------------------|
| <b><i>XAL1</i></b> | 360bp<br>30-35X                               | F 5' TGGTCGTGGTTCTTCTTCTGCT3'<br>R 5' TGTCTCCATGACTGCGAAGTT3'               |
| <b><i>SOC1</i></b> | 400bp<br>25X                                  | F 5' TGAGGCATACTAAGGATCGAGTCAG3'<br>R 5' GCGTCTCTACTTCAGAACTTGGGC3'         |
| <b><i>CO</i></b>   | 600bp<br>25X                                  | F 5' AACAGTGACAGATCCAGAGAACAG3'<br>R 5' TTCTCTGCATACGCTTTCCTTGAA3'          |
| <b><i>GI</i></b>   | 450bp<br>30X                                  | F 5' CTTTGTCTCCATGGATCAGT3'<br>R 5' AAGGAGTTCCACAAGCTGTA3'                  |
| <b><i>FLC</i></b>  | 596bp<br>30X                                  | F 5' TTCTCCAAACGTGCAACGGTCTC 3'<br>R 5' GATTTGTCCAGCAGGTGACATCTC 3'         |
| <b><i>FT</i></b>   | 380bp<br>30X                                  | F 5' CCTGCTACAACCTGGAACAACCTTT3'<br>R 5' GCTATATAGGCATCATCACCGTTCGTTACTCG3' |
| <b><i>LFY</i></b>  | 450bp<br>30X                                  | F 5' TCATTTGCTACTCTCCGCCGCT3'<br>R 5' CATTTTTCGCCACGGTCTTTAG3'              |
| <b><i>TUB</i></b>  | 600pb<br>25X                                  | F 5' CTCAAGAGGTTCTCAGCAGTA3'<br>R 5' TCACCTTCTTCATCCGCAGTT3'                |
